# Supplementary material
Source: PubMed Central journal article supplement (PMC4874724)
Supplement: rspb20160648supp1.pdf [file rspb20160648supp1.pdf]

## Supporting Information - Figure Legends

**Figure S1: Zinc tolerance groups by shape of zinc response curve.** Strains isolated from both the artificial (Wytham, shown in blue) and natural (Snowdonia, shown in red) populations of *Noccaea caerulescens* were grown on KB medium supplemented with a range of zinc concentrations from 0 to 20 mM, and the increase in OD<sub>600</sub> over 48 hours recorded. Bacterial growth curves were then clustered using k-means clustering into four groups representing different patterns of response to zinc. The average curve for each group is shown in green. Strains in Group 4 were the most tolerant, able to grow at 15 mM (mean IC<sub>50</sub> of approx. 14 mM Zn) Zn, while those in Group 1 showed strongly reduced growth even at 5 mM Zn (mean IC<sub>50</sub> of approx. 3.5 mM Zn). Numbers of strains in each group are shown in parentheses.

**Figure S2: Proportion of *Pseudomonas* strains isolated from the leaves of artificial (Wytham) population (A) and natural (Snowdonia) population (B) of *Noccaea caerulescens*, by species.** Species designations are based on top BLAST hits for *rpoD* genes.

**Table S1:** Primers used to amplify and sequence *16S*, *gyrB* and *rpoD* genes of isolated endophytes.

**Table S2:** GenBank ID numbers of reference *rpoD* sequences used in the creation of the phylogenetic tree in Figure 2.

**Table S3: Identity of bacterial strains causing disease symptoms when inoculated into *Noccaea caerulescens*, according to BLAST search using the 16S, *rpoD* and *gyrB* gene sequences.** *N. caerulescens* plants were grown on 10  $\mu$ M Zn (low zinc) and strains were suspended in 10 mM MgCl<sub>2</sub> at approximately 10<sup>6</sup> cfu/ml for inoculation.

**Table S4:** Symptoms recorded at 72 hours post inoculation (hpi). Bacteria were inoculated into 10-week-old plants at 10<sup>6</sup> cfu/ ml in 10 mM MgCl<sub>2</sub> and plants scored at 72 hpi for watersoaking, chlorosis or necrosis.

Group 1 ( $n = 14$ )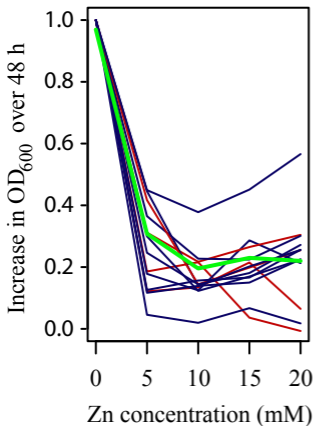Group 2 ( $n = 106$ )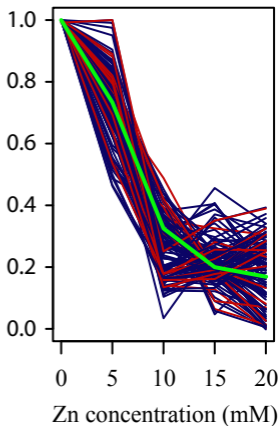Group 3 ( $n = 74$ )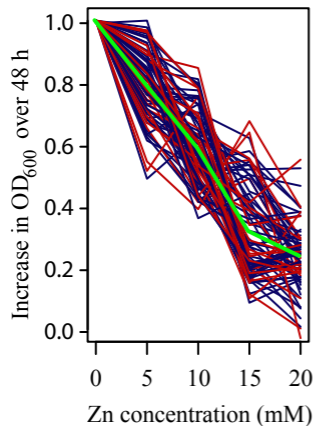Group 4 ( $n = 46$ )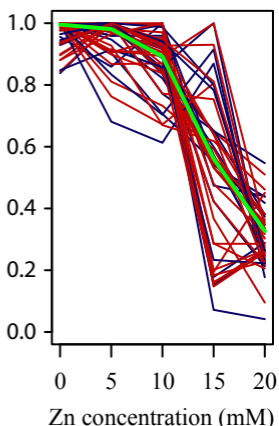

Snowdonia

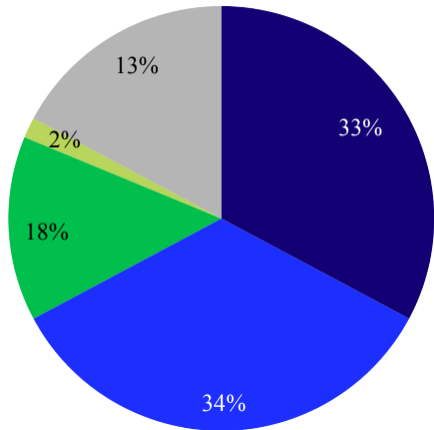

Wytham

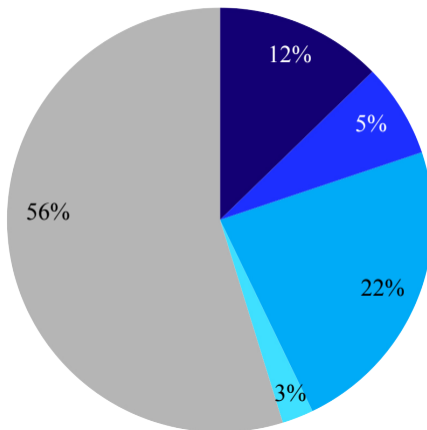

- fluorescens
- syringae
- graminis
- clemancea
- aeruginosa
- putida
- species unknown

---

**16S**

---

***rpoD******gyrB***

---

Forward

ccagccatgccgcgtgtg

caggtggaagacatcatccgcatg

tcbgcrvcvargtsatcatgac

Reverse

cgtactccccaggcggtc

ccgatgttgccttcctggatcag

ttgtcyttgggtctgsgagctgaa

Sequencing primer

ccagccatgccgcgtgtg

gygaaggcgaratygraatcg

ttgtcyttgggtctgsgagctgaa

---

| <b>Reference Strain</b>                   | <b>GenBank ID</b> |
|-------------------------------------------|-------------------|
| <i>P. fluorescens</i> PfO-1               | CP000094.2        |
| <i>P. fluorescens</i> Pf-5                | DQ458678.1        |
| <i>P. fluorescens</i> SBW25               | AM181176.4        |
| <i>P. graminis</i> LMG 21611T             | FN554469.1        |
| <i>P. syringae</i> pv. phaseolicola 1448A | CP000058.1        |
| <i>P. syringae</i> pv. phaseolicola B728a | AY610926.2        |
| <i>P. syringae</i> pv oryzae 1_6          | FN433254.1        |
| <i>P. syringae</i> pv. tomato DC3000      | EU296593.1        |
| <i>P. syringae</i> pv. tomato T1          | EU296597.1        |
| <i>P. aeruginosa</i> PAO1                 | AE004091.2        |
| <i>P. aeruginosa</i> LESB58               | FM209186.1        |
| <i>P. aeruginosa</i> 2192                 | AAKW01000060.1    |
| <i>P. aeruginosa</i> PA14                 | CP004055.1        |
| <i>P. aeruginosa</i> PACS2                | AAQW01000001.1    |
| <i>P. aeruginosa</i> PA7                  | CP000744.1        |
| <i>P. aeruginosa</i> C3719                | AAKV01000073.1    |
| <i>P. mendocina</i> ymp                   | CP000680.1        |
| <i>Azotobacter vinlandii</i> DJ           | CP001157.1        |
| <i>P. stutzeri</i> A1501                  | CP000304.1        |
| <i>Acinetobacter</i> ADP1                 | CR543861.1        |
| <i>Hahella chejuensis</i> KCTC 2396       | CP000155.1        |

| Strain     | <i>16S</i> - top BLAST hit        | Accession No. | <i>rpoD</i> - top BLAST hit              | Accession No. | <i>gyrB</i> - top BLAST hit            | Accession No. |
|------------|-----------------------------------|---------------|------------------------------------------|---------------|----------------------------------------|---------------|
| <b>E1</b>  | <i>Pseudomonas</i> sp.            | KF147105.1    | <i>P. syringae</i> pv. tomato DC3000     | AE016853.1    | <i>P. graminis</i> strain LMG 21611T   | FN554187.1    |
| <b>G1</b>  | <i>Pseudomonas</i> sp.            | KF147105.2    | <i>P. syringae</i> pv. tomato DC3000     | AE016853.2    | <i>P. graminis</i> strain LMG 21611T   | FN554187.0    |
| <b>C2</b>  | <i>Pseudomonas</i> sp.            | KF147105.3    | <i>P. syringae</i> pv. tomato DC3000     | AE016853.3    | <i>P. graminis</i> strain LMG 21611T   | FN554187.1    |
| <b>D3</b>  | <i>Pseudomonas thivervalensis</i> | GQ169380.1    | <i>P. graminis</i> strain LMG 21611T     | FN554469.1    | <i>P. graminis</i> strain LMG 21611T   | FN554187.2    |
| <b>A4</b>  | Uncultured <i>Pseudomonas</i> sp. | AM398402.1    | <i>P. marginalis</i> HRI 95              | AB039544.1    | <i>Pseudomonas</i> sp. R-42091         | HE603575.1    |
| <b>D4</b>  | <i>Pseudomonas</i> sp. BT1(2013)  | KF465830.1    | <i>P. graminis</i> strain LMG 21611T     | FN554469.1    | <i>P. graminis</i> strain LMG 21611T   | FN554187.2    |
| <b>A8</b>  | <i>Pseudomonas</i> sp. R5SpM3P1C1 | KF147105.3    | <i>P. syringae</i> pv. tomato DC3000     | AE016853.3    | <i>P. rhizosphaerae</i> LMG 21640T     | FN554224.1    |
| <b>C8</b>  | <i>Pseudomonas</i> sp. BT1(2013)  | KF465830.1    | <i>Pantoea vagans</i> C9-1               | CP002206.1    | <i>Rhodococcus erythropolis</i>        | AB018752.1    |
| <b>G8</b>  | Uncultured bacterium              | FN813929.1    | <i>P. marginalis</i> HRI 95              | AB039544.1    | <i>Citrobacter</i> sp. AQ-2            | AF005699.1    |
| <b>C10</b> | <i>Pseudomonas</i> sp. R5SpM3P2C6 | KF146995.1    | <i>P. cannabina</i> pv. alisalensis R-1  | AB781105.1    | <i>P. syringae</i> CFBP5010            | JN190428.1    |
| <b>B11</b> | Uncultured bacterium              | JQ047724.1    | <i>P. syringae</i> pv. syringae UMAF6024 | JX867788.1    | <i>P. syringae</i> pv. syringae UPN340 | KC852143.1    |
| <b>C11</b> | Uncultured bacterium              | JQ047463.1    | <i>P. graminis</i> strain LMG 21611T     | FN554469.1    | <i>P. graminis</i> strain LMG 21611T   | FN554187.1    |
| <b>F11</b> | <i>Pseudomonas</i> sp. BT1(2013)  | KF465830.1    | <i>Pantoea vagans</i> C9-1               | CP002206.1    | <i>Rhodococcus erythropolis</i>        | AB018752.1    |

| <b>Strain</b> | <b><i>N. caerulescens</i> symptoms at 72 hpi</b> |
|---------------|--------------------------------------------------|
| <b>E1</b>     | Chlorosis; Necrosis                              |
| <b>G1</b>     | Chlorosis; Necrosis                              |
| <b>C2</b>     | Chlorosis; Necrosis                              |
| <b>D3</b>     | Mild Chlorosis; Necrosis                         |
| <b>A4</b>     | Chlorosis; Necrosis                              |
| <b>D4</b>     | Chlorosis; Necrosis                              |
| <b>A8</b>     | Chlorosis; Necrosis                              |
| <b>C8</b>     | Necrosis                                         |
| <b>G8</b>     | Necrosis                                         |
| <b>C10</b>    | Chlorosis; Necrosis                              |
| <b>B11</b>    | Chlorosis; Necrosis                              |
| <b>C11</b>    | Necrosis                                         |
| <b>F11</b>    | Necrosis                                         |
